# Supplementary material for: A Population Based Study of Liver Function amongst Adults with Hyperuricemia and Gout in the United States
Source: MDPI journal article supplement (doi:10.3390/diseases9030061), 2021-09-17
Supplement: s1 [file s1]

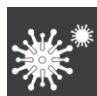

Supplemental Table S1. Predictors of Liver Enzymes on Regression (Adjusted Model).

|                        | ALT (U/L)         |           | AST (U/L)         |           | AST/ALT Ratio            |           |
|------------------------|-------------------|-----------|-------------------|-----------|--------------------------|-----------|
|                        | OR (95%CI)        | p-value   | OR (95%CI)        | p-value   | OR (95%CI)               | p-value   |
| Age                    | 0.99 (0.98, 0.99) | <0.001 ** | 0.99 (0.99, 1.00) | 0.270     | 1.02 (1.01, 1.02)        | <0.001 ** |
| Gender                 | 0.47 (0.42, 0.52) | <0.001 ** | 0.41 (0.37, 0.46) | <0.001 ** | 3.65 (3.28, 4.7)         | <0.001 ** |
| Race                   | 0.82 (0.81, 0.89) | <0.001 ** | 0.91 (0.87, 0.96) | <0.001 ** | 1.18 (1.13, 1.23)        | <0.001 ** |
| BMI                    | 1.05 (1.04, 1.07) | <0.001 ** | 1.02 (1.01, 1.03) | 0.005 *   | 0.92 (0.91, 0.93)        | <0.001 ** |
| HTN                    | 1.18 (1.03, 1.36) | 0.017 *   | 1.27 (1.07, 1.50) | <0.001 ** | 0.95 (0.85, 1.06)        | 0.367     |
| Uric Acid <sup>a</sup> | 1.58 (1.40, 1.77) | <0.001 ** | 1.60 (1.37, 1.87) | <0.001 ** | 0.83 (0.73, 0.94)        | 0.003 *   |
|                        | ALP (U/L)         |           | GGT (U/L)         |           | Total Bilirubin (μmol/L) |           |
|                        | OR (95%CI)        | p-value   | OR (95%CI)        | p-value   | OR (95%CI)               | p-value   |
| Age                    | 1.02 (1.00, 1.02) | <0.001 ** | 1.00 (1.00, 1.01) | <0.001**  | 0.99 (0.99, 1.00)        | 0.290     |
| Gender                 | 1.33 (0.99, 1.80) | 0.058     | 1.70 (1.42, 2.04) | <0.001 ** | 0.34 (0.30, 0.40)        | <0.001 ** |
| Race                   | 0.81 (0.73, 0.90) | <0.001 ** | 0.95 (0.88, 1.02) | 0.171     | 0.98 (0.93, 1.05)        | 0.607     |
| BMI                    | 1.04 (1.03, 1.05) | 0.026 *   | 1.04 (1.03, 1.04) | <0.001 ** | 0.93 (0.92, 0.94)        | <0.001 ** |
| HTN                    | 1.39 (1.04, 1.85) | 0.026 *   | 1.43 (1.18, 1.72) | <0.001 ** | 0.96 (0.81, 1.13)        | 0.607     |
| Uric Acid <sup>a</sup> | 0.82 (0.56, 1.19) | 0.282     | 1.81 (1.52, 2.17) | <0.001 ** | 1.63 (1.42, 1.88)        | <0.001 ** |

OR = Odds Ratio; CI = Confidence Interval; BMI: Body Mass Index; HTN: Hypertension (135/85 mmHg); Significant at \**p* < 0.05 and \*\**p* < 0.001. <sup>a</sup> Gender-based cut-off value [(*<*6.8 (M) *<*5.7 (F); *≥*6.8 (M) *≥*5.7 (F))].

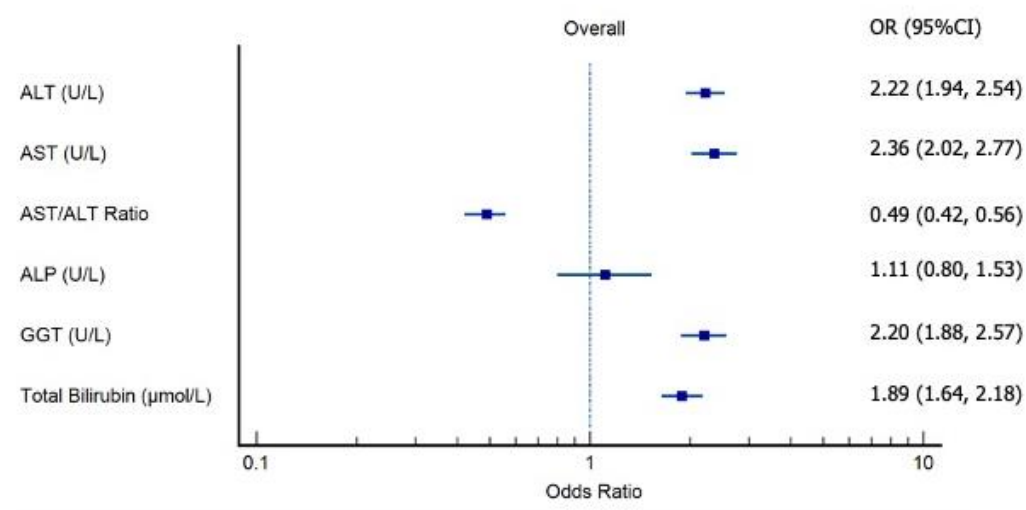

**Figure S1.** Forest plots of the odds of elevated liver enzymes with hyperuricemia using universal cut-off value.

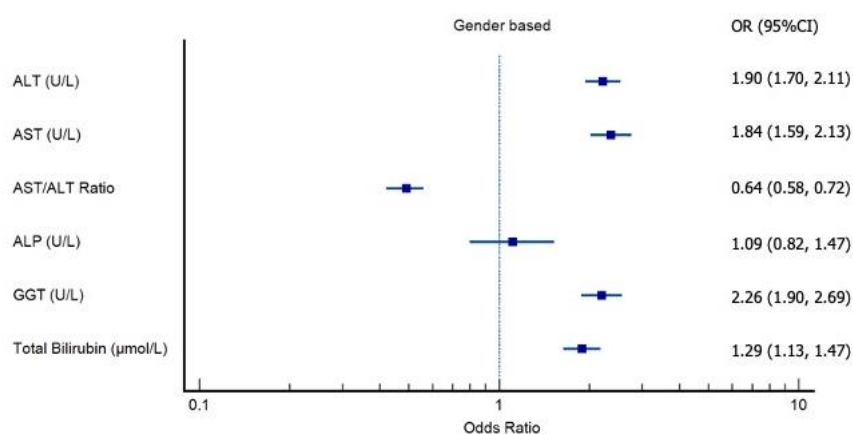

**Figure S2.** Forest plots of the odds of elevated liver enzymes with hyperuricemia using gender-based cut-off values.
